# Supplementary material for: Wind tunnel experiments: cold-air pooling and atmospheric decoupling above a melting snow patch
Source: Copernicus journal article supplement (doi:10.5194/tc-10-445-2016), 2016-02-29
Supplement: Supplementary file 1 [file tc-10-445-2016-supplement.pdf]

Supplement of The Cryosphere, 10, 445–458, 2016  
<http://www.the-cryosphere.net/10/445/2016/>  
doi:10.5194/tc-10-445-2016-supplement  
© Author(s) 2016. CC Attribution 3.0 License.

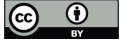

*Supplement of*

## **Wind tunnel experiments: cold-air pooling and atmospheric decoupling above a melting snow patch**

**Rebecca Mott et al.**

*Correspondence to:* Rebecca Mott (mott@slf.ch)

The copyright of individual parts of the supplement might differ from the CC-BY 3.0 licence.

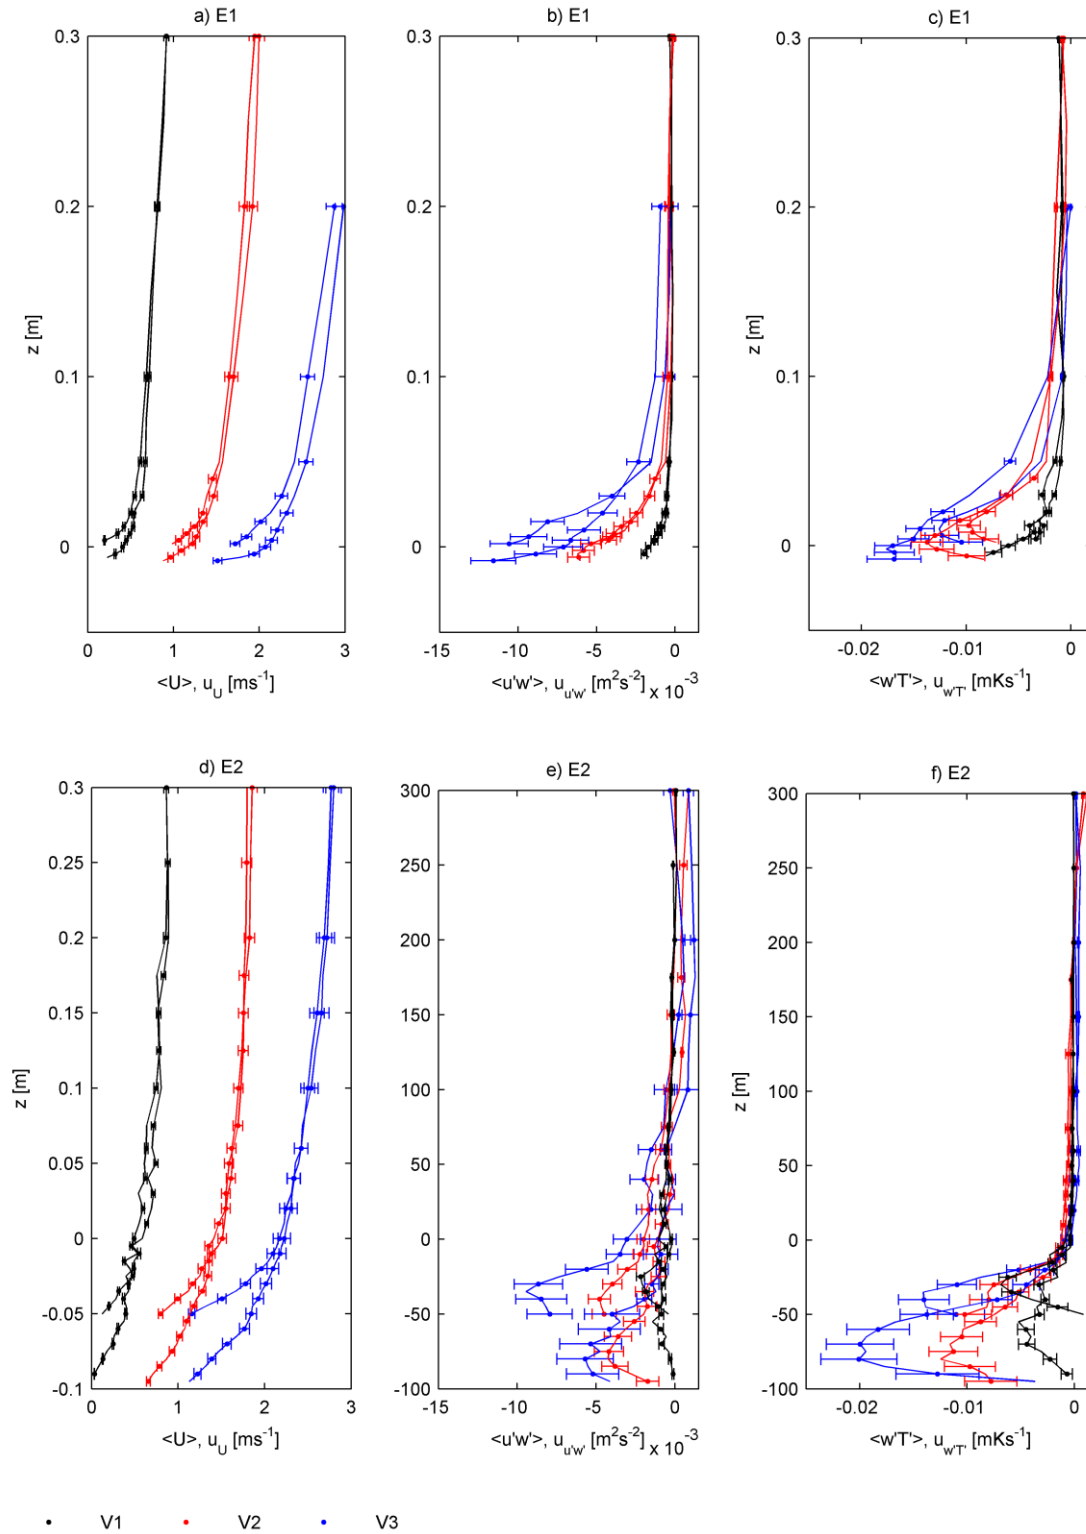

Figure 1 –Supplement: Profiles of stream-wise wind velocity (a, d), momentum fluxes (b, e) and heat fluxes (c, f) with corresponding uncertainty estimates shown as error bars for each measurement point.

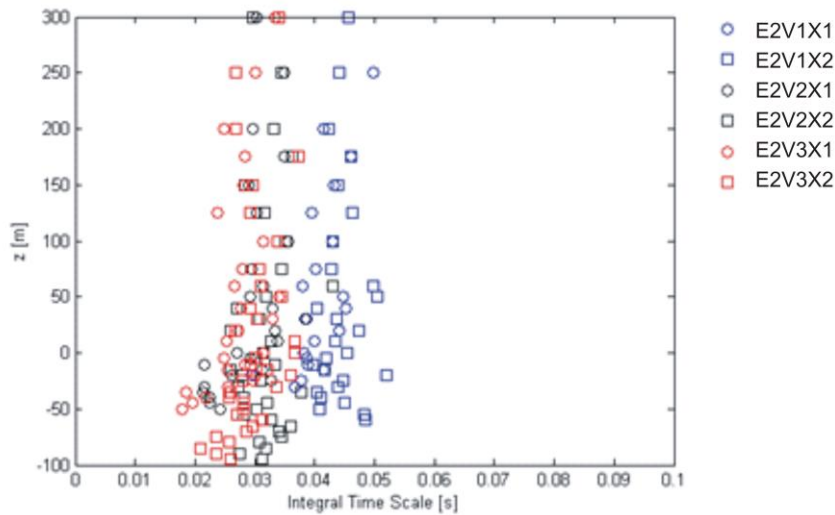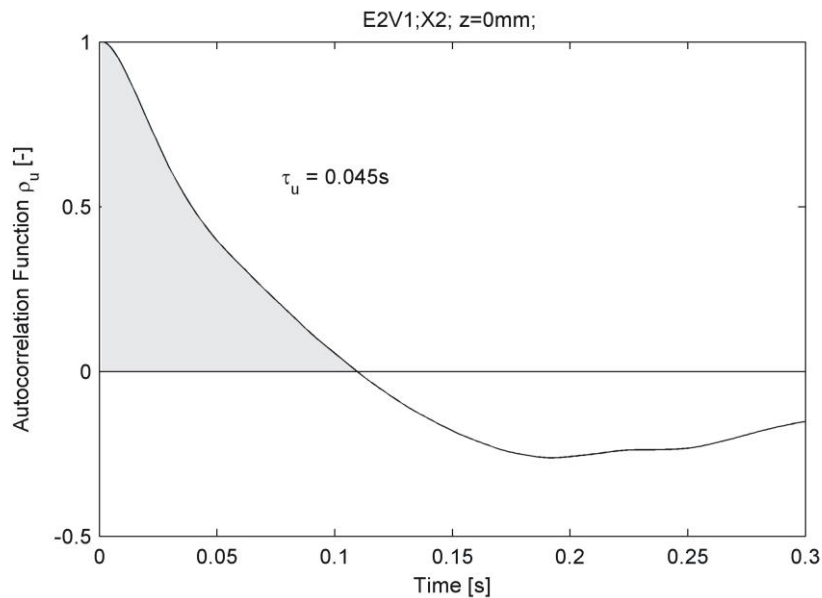

Figure 2 – Supplement: Experiments were designed to sample the flow at least hundred times the integral time scale (Tropea, C., Yarin, A.L. and Foss, J.F. eds., 2007. Springer handbook of experimental fluid mechanics. Springer Science & Business Media). As shown in the upper figure the integral time scale ranges between 0.02 and 0.05 for all the experiments. The bottom figure shows an example of the resulting integral time scale obtained by integrating the area below the autocorrelation function until this reaches zero.
